# Supplementary material
Source: PubMed Central journal article supplement (PMC5933325)
Supplement: EHP1742.s001.acco.pdf [file EHP1742.s001.acco.pdf]

**Note to readers with disabilities:** *EHP* strives to ensure that all journal content is accessible to all readers. However, some figures and Supplemental Material published in *EHP* articles may not conform to [508 standards](#) due to the complexity of the information being presented. If you need assistance accessing journal content, please contact [ehp508@niehs.nih.gov](mailto:ehp508@niehs.nih.gov). Our staff will work with you to assess and meet your accessibility needs within 3 working days.

### **Supplemental Material**

#### **Long-Term Exposure to Ambient Air Pollution and Incidence of Postmenopausal Breast Cancer in 15 European Cohorts within the ESCAPE Project**

Zorana J. Andersen, Massimo Stafoggia, Gudrun Weinmayr, Marie Pedersen, Claudia Galassi, Jeanette T. Jørgensen, Anna Oudin, Bertil Forsberg, David Olsson, Bente Oftedal, Gunn Marit Aasvang, Geir Aamodt, Andrei Pyko, Göran Pershagen, Michal Korek, Ulf De Faire, Nancy L. Pedersen, Claes-Göran Östenson, Laura Fratiglioni, Kirsten T. Eriksen, Anne Tjønneland, Petra H. Peeters, Bas Bueno-de-Mesquita, Michelle Plusquin, Timothy J. Key, Andrea Jaensch, Gabriele Nagel, Alois Lang, Meng Wang, Ming-Yi Tsai, Agnes Fournier, Marie-Christine Boutron-Ruault, Laura Baglietto, Sara Grioni, Alessandro Marcon, Vittorio Krogh, Fulvio Ricceri, Carlotta Sacerdote, Enrica Migliore, Ibon Tamayo-Uria, Pilar Amiano, Miren Dorronsoro, Roel Vermeulen, Ranjeet Sokhi, Menno Keuken, Kees de Hoogh, Rob Beelen, Paolo Vineis, Giulia Cesaroni, Bert Brunekreef, Gerard Hoek, and Ole Raaschou-Nielsen

#### **Table of Contents**

**Table S1.** Baseline characteristics of 15 European cohorts (CEANS consist of 4 Stockholm Sweden cohorts: SNACK-K, SALT/Twin gene, 60 y/IMPROVE, and SDPP; EPIC-NL consisting of 2 Dutch cohorts: EPIC MORGEN and EPIC PROSPECT).

**Table S2.** Mean (SD) of the elemental levels of PM<sub>2.5</sub> and PM<sub>10</sub> at participants residential addresses in 11 European cohorts (CEANS consist of 4 Stockholm Sweden cohorts: SNACK-K, SALT/Twin gene, 60 y/IMPROVE, and SDPP; EPIC-NL consisting of 2 Dutch cohorts: EPIC MORGEN and EPIC PROSPECT).

**Tables S3-S13.** Correlations between NO<sub>2</sub> (µg/m<sup>3</sup>), NO<sub>x</sub> (µg/m<sup>3</sup>), PM<sub>2.5</sub> (µg/m<sup>3</sup>), PM<sub>2.5</sub> absorbance (10<sup>-5</sup> m<sup>-1</sup>), PM<sub>10</sub> (µg/m<sup>3</sup>), and PM<sub>coarse</sub> (µg/m<sup>3</sup>) concentrations, and traffic intensity on the nearest road (traf<sub>near</sub>) (motor vehicles/day) at participant addresses in each cohort.

**Table S3.** Pearson correlations between exposure measures in EPIC-Umeå, Sweden (n = 3,762)

**Table S4.** Pearson correlations between exposure measures in HUBRO, Norway (n = 1,931)

**Table S5.** Pearson correlations between exposure measures in CEANS, Sweden (n = 5,997)

**Table S6.** Pearson correlations between exposure measures in DCH, Denmark (n = 15,835)

**Table S7.** Pearson correlations between exposure measures in EPIC-NL, Netherlands (n = 12,837)

**Table S8.** Pearson correlations between exposure measures in EPIC-Oxford, UK (n = 7,299)

**Table S9.** Pearson correlations between exposure measures in VHM&PP, Austria (n = 13,387)

**Table S10.** Pearson correlations between exposure measures in E3N, France (n = 5,319)

**Table S11.** Pearson correlations between exposure measures in EPIC-Varese, Italy (n 4,727)

**Table S12.** Pearson correlations between exposure measures in EPIC-Turin, Italy (n = 1,950)

**Table S13.** Pearson correlations between exposure measures in EPIC-San Sebastian, Italy (n = 1,776)

**Figure S1.** Adjusted associations between breast cancer and NO<sub>2</sub> (per 10 µg/m<sup>3</sup>) (left) and traffic intensity on the nearest road (per 5,000 motor vehicles/day) (right), (main Model 3), results from cohort-specific analyses and random-effects analyses.

**Figure S2.** Adjusted associations between breast cancer and vanadium component of PM<sub>2.5</sub> (right) and PM<sub>10</sub> (left) (main Model 3) and, results from cohort-specific analyses and random-effects analyses.

**Table S1.** Baseline characteristics of 15 European cohorts (CEANS consist of 4 Stockholm Sweden cohorts: SNACK-K, SALT/Twin gene, 60 y/IMPROVE, and SDPP; EPIC-NL consisting of 2 Dutch cohorts: EPIC MORGEN and EPIC PROSPECT).

| Individual characteristic at Baseline           | EPIC-Umeå, Sweden<br>N = 3,762 | HUBRO, Norway<br>N = 1,931 | CEANS, Sweden<br>N = 5,997 | DCH, Denmark<br>N = 15,835 | EPIC-NL, Netherlands<br>N = 12,837 | EPIC-Oxford, UK<br>N = 7,299 | VHM&PP, Austria<br>13,387 | EPIC-E3N, France<br>N = 5,319 | EPIC-Varese, Italy<br>N = 4,727 | EPIC-Turin, Italy<br>N = 1,950 | EPIC-San Sebastian, Spain<br>N = 1,776 |
|-------------------------------------------------|--------------------------------|----------------------------|----------------------------|----------------------------|------------------------------------|------------------------------|---------------------------|-------------------------------|---------------------------------|--------------------------------|----------------------------------------|
| Age, mean±SD                                    | 54.4 (6.0)                     | 57.2 (5.7)                 | 59.8 (12.9)                | 57.7 (4.2)                 | 58.6 (5.9)                         | 59.7 (8.3)                   | 65.1 (7.5)                | 57.2 (5.3)                    | 56.6 (6.7)                      | 55.2 (5.1)                     | 55.3 (5.7)                             |
| BMI (kg/m <sup>2</sup> ), mean±SD               | 25.3 (4.3)                     | 25.3 (4.3)                 | 25.7 (4.4)                 | 25.6 (4.4)                 | 25.7 (4.1)                         | 25.1 (4.2)                   | 26.5 (4.6)                | 23.1 (3.2)                    | 26.2 (4.4)                      | 25.3 (4.2)                     | 28.0 (4.5)                             |
| Physical Activity, n (%)                        | NA                             |                            |                            |                            |                                    |                              | NA                        |                               |                                 |                                |                                        |
| No                                              |                                | 592 (30.7)                 | 4,039 (67.4)               | 6,591 (41.6)               | 4,634 (36.1)                       | 5,020 (68.8)                 |                           | 7 (0.1)                       | 1,061 (22.4)                    | 537 (27.5)                     | 337 (19.0)                             |
| Yes                                             |                                | 1,339 (69.3)               | 1,958 (32.6)               | 9,244 (58.4)               | 8,203 (63.9)                       | 2,279 (31.2)                 |                           | 5,312 (99.9)                  | 3,666 (77.6)                    | 1,413 (72.5)                   | 1,439 (81.0)                           |
| Smoking Status                                  |                                |                            |                            |                            |                                    |                              |                           |                               |                                 |                                |                                        |
| Current, n (%)                                  | 729 (19.3)                     | 553 (28.6)                 | 1,281 (21.4)               | 5,495 (34.7)               | 2,929 (22.8)                       | 593 (8.1)                    | 632 (4.7)                 | 737 (13.9)                    | 758 (16.0)                      | 355 (18.2)                     | 127 (7.2)                              |
| Previous, n (%)                                 | 606 (16.1)                     | 540 (28.0)                 | 1,848 (30.8)               | 3,680 (23.2)               | 4,031 (31.4)                       | 2,468 (33.8)                 | 368 (2.7)                 | 1,317 (24.8)                  | 607 (12.8)                      | 382 (19.6)                     | 118 (6.6)                              |
| Never, n (%)                                    | 2,427 (64.5)                   | 838 (43.4)                 | 2,868 (47.8)               | 6,660 (42.1)               | 5,877 (45.8)                       | 4,238 (58.1)                 | 12,387 (92.5)             | 3,265 (61.4)                  | 3,362 (71.1)                    | 1,213 (62.2)                   | 1,531 (86.2)                           |
| Smoking intensity <sup>a</sup> (g/day), mean±SD | 2.2 (5.2)                      | 7.0 (8.2)                  | 5.7 (7.3)                  | 5.0 (8.2)                  | 5.8 (7.7)                          | 4.1 (7.1)                    |                           | 3.6 (6.9)                     | 2.4 (4.8)                       | 3.5 (5.8)                      | 1.4 (4.7)                              |
| Smoking duration <sup>a</sup> (years), mean±SD  | 9.8 (14.7)                     | 14.7 (16.0)                | 13.4 (15.9)                | 16.9 (17.2)                | 15.4 (16.9)                        | 8.5 (13.6)                   | NA                        | 8.3 (13.2)                    | 7.4 (13.0)                      | 9.2 (13.5)                     | 2.9 (8.3)                              |
| Alcohol use <sup>b</sup> (g/day), mean±SD       | 1.8 (2.5)                      |                            | 2.5 (0.7)                  | 14.4 (15.9)                | 8.6 (12.4)                         | 7.0 (9.1)                    | NA                        | 12.2 (14.6)                   | 8.4 (11.2)                      | 9.1 (12.7)                     | 6.1 (10.1)                             |
| Weekly                                          |                                | 1,009 (52.3)               |                            |                            |                                    |                              |                           |                               |                                 |                                |                                        |
| Occasionally                                    |                                | 784 (40.6)                 |                            |                            |                                    |                              |                           |                               |                                 |                                |                                        |
| Never/not in the past                           |                                | 138 (7.1)                  |                            |                            |                                    |                              |                           |                               |                                 |                                |                                        |
| Educational Level                               |                                |                            |                            |                            |                                    |                              | NA                        |                               |                                 |                                |                                        |
| Low, n (%)                                      | 1,594 (42.4)                   | 435 (22.5)                 | 2,223 (37.1)               | 4,810 (30.4)               | 3,184 (24.8)                       | 4,135 (56.7)                 |                           | 336 (6.3)                     | 3,505 (74.1)                    | 1,233 (63.2)                   | 1,550 (87.3)                           |
| Medium, n (%)                                   | 1,481 (39.4)                   | 906 (46.9)                 | 1,961 (32.7)               | 8,108 (51.2)               | 7,894 (61.5)                       | 1,504 (20.6)                 |                           | 387 (7.3)                     | 993 (21)                        | 575 (29.5)                     | 226 (12.7)                             |
| High, n (%)                                     | 687 (18.3)                     | 590 (30.6)                 | 1,813 (30.2)               | 2,917 (18.4)               | 1,759 (13.7)                       | 1,660 (22.7)                 |                           | 4,596 (86.4)                  | 229 (4.8)                       | 142 (7.3)                      | -                                      |
| Employment Status                               |                                |                            |                            |                            | NA                                 |                              |                           |                               |                                 | NA                             | NA                                     |
| Unemployed, n (%)                               | 699 (18.5)                     | 468 (24.2)                 | 2,660 (44.4)               | 4,599 (29)                 |                                    | 3,760 (51.5)                 | 11,149 (83.3)             | 1,925 (36.2)                  | 1,320 (27.9)                    |                                |                                        |
| Employed, n (%)                                 | 3,063 (81.4)                   | 1,463 (75.8)               | 3,377 (55.6)               | 11,236 (71)                |                                    | 3,539 (48.5)                 | 2,238 (16.7)              | 3,367 (63.3)                  | 3407 (72.1)                     |                                |                                        |
| Nigh shift work (nurse, physician)              | NA                             | NA                         | NA                         |                            | NA                                 | NA                           | NA                        | NA                            | NA                              | NA                             | NA                                     |
| No, n (%)                                       |                                |                            |                            | 12,814 (80.9)              |                                    |                              |                           |                               |                                 |                                |                                        |
| Yes, n (%)                                      |                                |                            |                            | 3,021 (19.1)               |                                    |                              |                           |                               |                                 |                                |                                        |

|                                                  |    |    |                 |                 |                 |                 |    |                |                 |            |    |
|--------------------------------------------------|----|----|-----------------|-----------------|-----------------|-----------------|----|----------------|-----------------|------------|----|
| Nulliparous, n (%)                               | NA | NA | 3,337<br>(55.6) | 1,509 (9.5)     | 1,638<br>(12.8) | 1,004<br>(13.8) | NA | 834 (15.7)     | 484 (10.2)      | 92 (4.7)   | NA |
| Age at 1 <sup>st</sup> birth (years),<br>mean±SD | NA | NA | NA              | 23.3 (4.3)      | 25.6 (4.0)      | 25.9 (4.4)      | NA | 21.5<br>(10.0) | 23.2 (8.8)      | 24.8 (6.9) | NA |
| Number of children                               | NA | NA | NA              | NA              | NA              | NA              | NA | NA             | NA              | NA         | NA |
| 0 children, n (%)                                |    |    |                 | 1,509 (9.5)     |                 | 1,004<br>(13.8) |    |                | 484 (10.2)      | 92 (4.7)   |    |
| 1 child, n (%)                                   |    |    |                 | 1,888<br>(11.9) |                 | 3,502<br>(48.0) |    |                | 888 (18.8)      | 674 (34.6) |    |
| 2 children, n (%)                                |    |    |                 | 4,860<br>(30.7) |                 | 1,846<br>(25.3) |    |                | 2,151<br>(45.5) | 920 (47.2) |    |
| 3 children, n (%)                                |    |    |                 | 3,783<br>(23.9) |                 | 699 (9.6)       |    |                | 856 (18.1)      | 205 (10.5) |    |
| 4 children, n (%)                                |    |    |                 | 2,165<br>(13.7) |                 | 180 (2.5)       |    |                | 242 (5.1)       | 38 (1.9)   |    |
| 5 children, n (%)                                |    |    |                 | 971 (6.1)       |                 | 41 (0.6)        |    |                | 68 (1.4)        | 17 (0.9)   |    |
| 6 children, n (%)                                |    |    |                 | 419 (2.6)       |                 | 12 (0.2)        |    |                | 23 (0.5)        | 2 (0.1)    |    |
| 7 children, n (%)                                |    |    |                 | 151 (1.0)       |                 | 9 (0.1)         |    |                | 14 (0.3)        | 2 (0.1)    |    |
| 8 children, n (%)                                |    |    |                 | 89 (0.6)        |                 | 5 (0.1)         |    |                | 1 (0)           | -          |    |
| 9 children, n (%)                                |    |    |                 |                 |                 | 1 (0)           |    |                | -               | -          |    |

| Individual characteristic at Baseline         | EPIC-Umeå,<br>Sweden | HUBRO,<br>Norway | CEANS,<br>Sweden | DCH,<br>Denmark | EPIC-NL,<br>Netherlands | EPIC-<br>Oxford, UK | VHM&PP,<br>Austria | E3N, France  | EPIC-Varese,<br>Italy | EPIC-Turin,<br>Italy | EPIC-San<br>Sebastian,<br>Spain |
|-----------------------------------------------|----------------------|------------------|------------------|-----------------|-------------------------|---------------------|--------------------|--------------|-----------------------|----------------------|---------------------------------|
| Breast feeding                                | NA                   | NA               | NA               | NA              |                         |                     | NA                 |              |                       | NA                   | NA                              |
| No, n (%)                                     |                      |                  |                  |                 | 3,241 (25.2)            |                     |                    | 2,130 (40.0) | 1,316 (27.8)          |                      |                                 |
| Yes, n (%)                                    |                      |                  |                  |                 | 8,116 (63.2)            |                     |                    | 3,189 (60.0) | 3,411 (72.2)          |                      |                                 |
| Hormone Therapy (HT) Use                      | NA                   |                  | NA               |                 |                         |                     | NA                 |              |                       |                      |                                 |
| Current, n (%)                                |                      | 940 (48.7)       |                  | 6,023 (38.0)    | 1,296 (10.1)            | 2,375 (32.5)        |                    |              | 209 (4.4)             |                      |                                 |
| Former, n (%)                                 |                      | 264 (13.7)       |                  | 2,495 (15.8)    | 1,741 (13.6)            | 977 (13.4)          |                    |              | 825 (17.5)            |                      |                                 |
| Never, n (%)                                  |                      | 727 (37.6)       |                  | 7,317 (46.2)    | 9,695 (75.5)            | 3,947 (54.1)        |                    |              | 3,693 (78.1)          |                      |                                 |
| No, n (%)                                     |                      |                  |                  |                 |                         |                     |                    | 1,997 (37.5) |                       | 598 (30.7)           | 298 (16.8)                      |
| Yes, n (%)                                    |                      |                  |                  |                 |                         |                     |                    | 3,322 (62.5) |                       | 1,352 (69.3)         | 1,478 (83.2)                    |
| HT use duration <sup>c</sup> (years), mean±SD | 4.1 (5.0)            |                  | NA               | 3.4 (5.4)       |                         | 2.0 (3.5)           | NA                 | 4.2 (4.1)    | 0.5 (1.5)             | 0.9 (2.0)            | NA                              |
| Oral contraceptive use                        | NA                   | NA               | NA               |                 |                         |                     | NA                 | NA           |                       |                      | NA                              |
| Never/No, n (%)                               |                      |                  |                  | 9,157 (57.8)    | 12,752 (99.3)           | 3,553 (48.7)        |                    |              | 3,471 (73.4)          | 1,363 (69.9)         |                                 |
| Ever/Yes, n (%)                               |                      |                  |                  | 6,678 (42.2)    | 64 (0.5)                | 3,746 (51.3)        |                    |              | 1,256 (26.6)          | 587 (30.1)           |                                 |
| Definition of area SES                        |                      |                  |                  |                 |                         |                     |                    |              |                       |                      |                                 |
| Area-separator based on municipality          | X                    | X                | X                | X               |                         | X                   | X                  |              | X                     |                      | X                               |
| Area-separator based on neighborhood          |                      |                  |                  |                 | X                       |                     |                    |              |                       | X                    |                                 |
| Census block                                  |                      |                  |                  |                 |                         |                     |                    |              |                       |                      |                                 |
| Definition of SES                             |                      |                  |                  |                 |                         |                     |                    |              |                       |                      |                                 |
| Unemployed rate in municipality               | X                    | X                | X                |                 |                         | X                   |                    |              | X                     |                      |                                 |
| Mean income in municipality                   |                      |                  |                  | X               |                         |                     |                    |              |                       |                      | X                               |
| % people low income, neighborhood             |                      |                  |                  |                 | X                       |                     |                    |              |                       |                      |                                 |
| Area deprivation index                        |                      |                  |                  |                 |                         |                     |                    |              |                       | X                    |                                 |

<sup>a</sup>among smokers, <sup>b</sup>among alcohol consumers; <sup>c</sup>among HT users.

**Table S2.** Mean (SD) of the elemental levels of PM<sub>2.5</sub> and PM<sub>10</sub> at participants residential addresses in 11 European cohorts (CEANS consist of 4 Stockholm Sweden cohorts: SNACK-K, SALT/Twin gene, 60 y/IMPROVE, and SDPP; EPIC-NL consisting of 2 Dutch cohorts: EPIC MORGEN and EPIC PROSPECT).

| Exposure                | Cu<br>(ng/m <sup>3</sup> ) | Fe<br>(ng/m <sup>3</sup> ) | K<br>(ng/m <sup>3</sup> ) | Ni<br>(ng/m <sup>3</sup> ) | S<br>(ng/m <sup>3</sup> ) | Si<br>(ng/m <sup>3</sup> ) | V<br>(ng/m <sup>3</sup> ) | Zn<br>(ng/m <sup>3</sup> ) |
|-------------------------|----------------------------|----------------------------|---------------------------|----------------------------|---------------------------|----------------------------|---------------------------|----------------------------|
| <b>PM<sub>2.5</sub></b> |                            |                            |                           |                            |                           |                            |                           |                            |
| HUBRO, Norway           | 3.0 (1.7)                  | 44.4 (30.3)                | 87.5 (17.4)               | 0.6 (0.3)                  | 374.5 (28.7)              | -                          | -                         | 14.1 (2.7)                 |
| CEANS, Sweden           | 2.2 (1.9)                  | 106.0 (68.4)               | 103.6 (18.2)              | -                          | 509.9 (16)                | 178.3 (69.1)               | 1.3 (0.2)                 | 10.7 (1)                   |
| DCH, Denmark            | 2.9 (1.3)                  | 98.2 (52.4)                | 112.1 (4.8)               | 1.1 (0.1)                  | 716.9 (25.9)              | 50.6 (7)                   | 2.4 (0.3)                 | 12.7 (0.8)                 |
| EPIC-NL, Netherlands    | 3.6 (0.7)                  | 91.5 (17.9)                | 115.1 (6.7)               | 2 (0.3)                    | 895.9 (26)                | 85.4 (9.2)                 | 3.2 (0.5)                 | 25.0 (8.2)                 |
| VHM&PP, Austria         | 4.0 (1.0)                  | 67.4 (7.8)                 | 332.9 (30.8)              | 0.1 (0.1)                  | 620.4 (31.6)              | 64.7 (7)                   | -                         | 22.4 (3.3)                 |
| EPIC-Turin, Italy       | 10.1 (2.4)                 | 301.1 (58.8)               | 379.5 (21.3)              | 2.7 (0.5)                  | 1081.2 (39.8)             | 196.7 (31.5)               | 2.2 (0.3)                 | 37.3 (4.3)                 |
| <b>PM<sub>10</sub></b>  |                            |                            |                           |                            |                           |                            |                           |                            |
| HUBRO, Norway           | 9.9 (6.7)                  | 346.9 (177.8)              | -                         | -                          | 426.4 (32.9)              | 527.0 (232.4)              | 2.4 (0.8)                 | 17.5 (5.3)                 |
| CEANS, Sweden           | 11.1 (10.2)                | 516.2 (295.6)              | 307.6 (106)               | -                          | 552.4 (25.8)              | 1073.3 (521.1)             | 2.2 (0.5)                 | 17.5 (8.2)                 |
| DCH, Denmark            | 12.1 (9.5)                 | 304.8 (187.8)              | 189.2 (10.6)              | 1.0 (0.2)                  | 794.2 (31.4)              | 301.8 (80.2)               | 2.8 (0.5)                 | 19.8 (3.9)                 |
| EPIC-NL, Netherlands    | 12.8 (4)                   | 418 (127.8)                | 211.5 (16.8)              | 2.4 (0.4)                  | 1014.3 (22.2)             | 400.7 (83.4)               | 3.8 (0.5)                 | 37 (12.9)                  |
| VHM&PP, Austria         | 9.2 (2.7)                  | 325.8 (43.9)               | 397.9 (35.1)              | 0.2 (0.2)                  | 662.6 (46.3)              | 376.5 (61)                 | 0.5 (0.1)                 | 29.3 (5.7)                 |
| EPIC-Turin, Italy       | 67.1 (17.8)                | 1701.9 (413.6)             | 607.7 (51.8)              | 6.8 (1.3)                  | 1192.3 (76.7)             | 1463.7 (257.5)             | 3.9 (0.6)                 | 68.2 (10.4)                |

Cu-copper; Fe-iron; K-potassium; Ni-nickel; S- sulphur; Si-silicon;V-vanadium; Zn-zinc.

**Tables S3-S13: Correlations between NO<sub>2</sub> (µg/m<sup>3</sup>), NO<sub>x</sub> (µg/m<sup>3</sup>), PM<sub>2.5</sub> (µg/m<sup>3</sup>), PM<sub>2.5</sub> absorbance (PM<sub>2.5</sub> abs) (10<sup>-5</sup> m<sup>-1</sup>), PM<sub>10</sub> (µg/m<sup>3</sup>), and PM<sub>coarse</sub> (µg/m<sup>3</sup>) concentrations, and traffic intensity on the nearest road (trafnear) (motor vehicles/day) at participant addresses in each cohort.**

**Table S3. Pearson correlations between exposure measures in EPIC-Umeå, Sweden (n = 3,762)**

| Pollutant       | NO <sub>2</sub> | NO <sub>x</sub> | trafnear |
|-----------------|-----------------|-----------------|----------|
| NO <sub>2</sub> | 1.00            |                 |          |
| NO <sub>x</sub> | 0.99            | 1.00            |          |
| Trafnear        | 0.25            | 0.25            | 1.00     |

**Table S4. Pearson correlations between exposure measures in HUBRO, Norway (n = 1,931)**

| Pollutant             | NO <sub>2</sub> | NO <sub>x</sub> | PM <sub>2.5</sub> | PM <sub>2.5</sub> abs | PM <sub>10</sub> | PM <sub>coarse</sub> | trafnear |
|-----------------------|-----------------|-----------------|-------------------|-----------------------|------------------|----------------------|----------|
| NO <sub>2</sub>       | 1.00            |                 |                   |                       |                  |                      |          |
| NO <sub>x</sub>       | 0.92            | 1.00            |                   |                       |                  |                      |          |
| PM <sub>2.5</sub>     | 0.41            | 0.42            | 1.00              |                       |                  |                      |          |
| PM <sub>2.5</sub> abs | 0.75            | 0.73            | 0.45              | 1.00                  |                  |                      |          |
| PM <sub>10</sub>      | 0.37            | 0.51            | 0.73              | 0.28                  | 1.00             |                      |          |
| PM <sub>coarse</sub>  | 0.54            | 0.73            | 0.26              | 0.39                  | 0.66             | 1.00                 |          |
| trafnear              | 0.38            | 0.38            | 0.08              | 0.24                  | 0.37             | 0.55                 | 1.00     |

**Table S5. Pearson correlations between exposure measures in CEANS, Sweden (n = 5,997)**

| Pollutant             | NO <sub>2</sub> | NO <sub>x</sub> | PM <sub>2.5</sub> | PM <sub>2.5</sub> abs | PM <sub>10</sub> | PM <sub>coarse</sub> | trafnear |
|-----------------------|-----------------|-----------------|-------------------|-----------------------|------------------|----------------------|----------|
| NO <sub>2</sub>       | 1.00            |                 |                   |                       |                  |                      |          |
| NO <sub>x</sub>       | 0.95            | 1.00            |                   |                       |                  |                      |          |
| PM <sub>2.5</sub>     | 0.67            | 0.55            | 1.00              |                       |                  |                      |          |
| PM <sub>2.5</sub> abs | 0.90            | 0.79            | 0.86              | 1.00                  |                  |                      |          |
| PM <sub>10</sub>      | 0.55            | 0.56            | 0.55              | 0.64                  | 1.00             |                      |          |
| PM <sub>coarse</sub>  | 0.57            | 0.58            | 0.56              | 0.66                  | 0.99             | 1.00                 |          |
| trafnear              | 0.50            | 0.59            | 0.28              | 0.39                  | 0.37             | 0.38                 | 1.00     |

**Table S6. Pearson correlations between exposure measures in DCH, Denmark (n = 15,835)**

| Pollutant             | NO <sub>2</sub> | NO <sub>x</sub> | PM <sub>2.5</sub> | PM <sub>2.5</sub> abs | PM <sub>10</sub> | PM <sub>coarse</sub> | trafnear |
|-----------------------|-----------------|-----------------|-------------------|-----------------------|------------------|----------------------|----------|
| NO <sub>2</sub>       | 1.00            |                 |                   |                       |                  |                      |          |
| NO <sub>x</sub>       | 0.97            | 1.00            |                   |                       |                  |                      |          |
| PM <sub>2.5</sub>     | 0.56            | 0.47            | 1.00              |                       |                  |                      |          |
| PM <sub>2.5</sub> abs | 0.70            | 0.65            | 0.47              | 1.00                  |                  |                      |          |
| PM <sub>10</sub>      | 0.76            | 0.66            | 0.73              | 0.68                  | 1.00             |                      |          |
| PM <sub>coarse</sub>  | 0.71            | 0.66            | 0.59              | 0.60                  | 0.65             | 1.00                 |          |
| trafnear              | 0.62            | 0.71            | 0.20              | 0.42                  | 0.30             | 0.43                 | 1.00     |

**Table S7. Pearson correlations between exposure measures in EPIC-NL, Netherlands (n = 12,837)**

| Pollutant             | NO <sub>2</sub> | NO <sub>x</sub> | PM <sub>2.5</sub> | PM <sub>2.5</sub> abs | PM <sub>10</sub> | PM <sub>coarse</sub> | trafnear |
|-----------------------|-----------------|-----------------|-------------------|-----------------------|------------------|----------------------|----------|
| NO <sub>2</sub>       | 1.00            |                 |                   |                       |                  |                      |          |
| NO <sub>x</sub>       | 0.79            | 1.00            |                   |                       |                  |                      |          |
| PM <sub>2.5</sub>     | 0.37            | 0.51            | 1.00              |                       |                  |                      |          |
| PM <sub>2.5</sub> abs | 0.77            | 0.80            | 0.79              | 1.00                  |                  |                      |          |
| PM <sub>10</sub>      | 0.80            | 0.85            | 0.66              | 0.94                  | 1.00             |                      |          |
| PM <sub>coarse</sub>  | 0.64            | 0.68            | 0.50              | 0.61                  | 0.70             | 1.00                 |          |
| trafnear              | 0.23            | 0.25            | 0.28              | 0.30                  | 0.22             | 0.38                 | 1.00     |

**Table S8. Pearson correlations between exposure measures in EPIC-Oxford, UK (n = 7,299)**

| Pollutant             | NO <sub>2</sub> | NO <sub>x</sub> | PM <sub>2.5</sub> | PM <sub>2.5</sub> abs | PM <sub>10</sub> | PM <sub>coarse</sub> | trafnear |
|-----------------------|-----------------|-----------------|-------------------|-----------------------|------------------|----------------------|----------|
| NO <sub>2</sub>       | 1.00            |                 |                   |                       |                  |                      |          |
| NO <sub>x</sub>       | 0.92            | 1.00            |                   |                       |                  |                      |          |
| PM <sub>2.5</sub>     | 0.86            | 0.85            | 1.00              |                       |                  |                      |          |
| PM <sub>2.5</sub> abs | 0.74            | 0.66            | 0.57              | 1.00                  |                  |                      |          |
| PM <sub>10</sub>      | 0.51            | 0.53            | 0.56              | 0.54                  | 1.00             |                      |          |
| PM <sub>coarse</sub>  | 0.16            | 0.20            | 0.16              | 0.35                  | 0.75             | 1.00                 |          |
| trafnear              | 0.26            | 0.36            | 0.19              | 0.23                  | 0.22             | 0.21                 | 1.00     |

**Table S9. Pearson correlations between exposure measures in VHM&PP, Austria (n = 13,387)**

| Pollutant             | NO <sub>2</sub> | NO <sub>x</sub> | PM <sub>2.5</sub> | PM <sub>2.5</sub> abs | PM <sub>10</sub> | PM <sub>coarse</sub> | trafnear |
|-----------------------|-----------------|-----------------|-------------------|-----------------------|------------------|----------------------|----------|
| NO <sub>2</sub>       | 1.00            |                 |                   |                       |                  |                      |          |
| NO <sub>x</sub>       | 0.51            | 1.00            |                   |                       |                  |                      |          |
| PM <sub>2.5</sub>     | 0.46            | 0.46            | 1.00              |                       |                  |                      |          |
| PM <sub>2.5</sub> abs | 0.68            | 0.50            | 0.69              | 1.00                  |                  |                      |          |
| PM <sub>10</sub>      | 0.60            | 0.40            | 0.69              | 0.74                  | 1.00             |                      |          |
| PM <sub>coarse</sub>  | 0.85            | 0.50            | 0.29              | 0.65                  | 0.56             | 1.00                 |          |
| trafnear              | 0.25            | 0.21            | 0.01              | 0.39                  | 0.07             | 0.35                 | 1.00     |

**Table S10. Pearson correlations between exposure measures in E3N, France (n = 5,319)**

|                 | NO <sub>2</sub> | NO <sub>x</sub> | trafnear |
|-----------------|-----------------|-----------------|----------|
| NO <sub>2</sub> | 1.00            |                 |          |
| NO <sub>x</sub> | 0.93            | 1.00            |          |
| Trafnear        | 0.37            | 0.39            | 1.00     |

**Table S11. Pearson correlations between exposure measures in EPIC-Varese, Italy (n 4,727)**

| Pollutant       | NO <sub>2</sub> | NO <sub>x</sub> |
|-----------------|-----------------|-----------------|
| NO <sub>2</sub> | 1.00            |                 |
| NO <sub>x</sub> | 1.00            | 1.00            |

**Table S12. Pearson correlations between exposure measures in EPIC-Turin, Italy (n = 1,950)**

| Pollutant             | NO <sub>2</sub> | NO <sub>x</sub> | PM <sub>2.5</sub> | PM <sub>2.5</sub> abs | PM <sub>10</sub> | PM <sub>coarse</sub> | trafnear |
|-----------------------|-----------------|-----------------|-------------------|-----------------------|------------------|----------------------|----------|
| NO <sub>2</sub>       | 1               |                 |                   |                       |                  |                      |          |
| NO <sub>x</sub>       | 0.81            | 1               |                   |                       |                  |                      |          |
| PM <sub>2.5</sub>     | 0.71            | 0.80            | 1                 |                       |                  |                      |          |
| PM <sub>2.5</sub> abs | 0.93            | 0.77            | 0.77              | 1                     |                  |                      |          |
| PM <sub>10</sub>      | 0.61            | 0.42            | 0.57              | 0.56                  | 1                |                      |          |
| PM <sub>coarse</sub>  | 0.45            | 0.25            | 0.46              | 0.42                  | 0.95             | 1                    |          |
| trafnear              | 0.22            | 0.49            | 0.37              | 0.18                  | 0.12             | -0.00                | 1        |

**Table S13. Pearson correlations between exposure measures in EPIC-San Sebastian, Italy (n = 1,776)**

| Pollutant       | NO <sub>2</sub> | NO <sub>x</sub> |
|-----------------|-----------------|-----------------|
| NO <sub>2</sub> | 1.00            |                 |
| NO <sub>x</sub> | 0.99            | 1.00            |



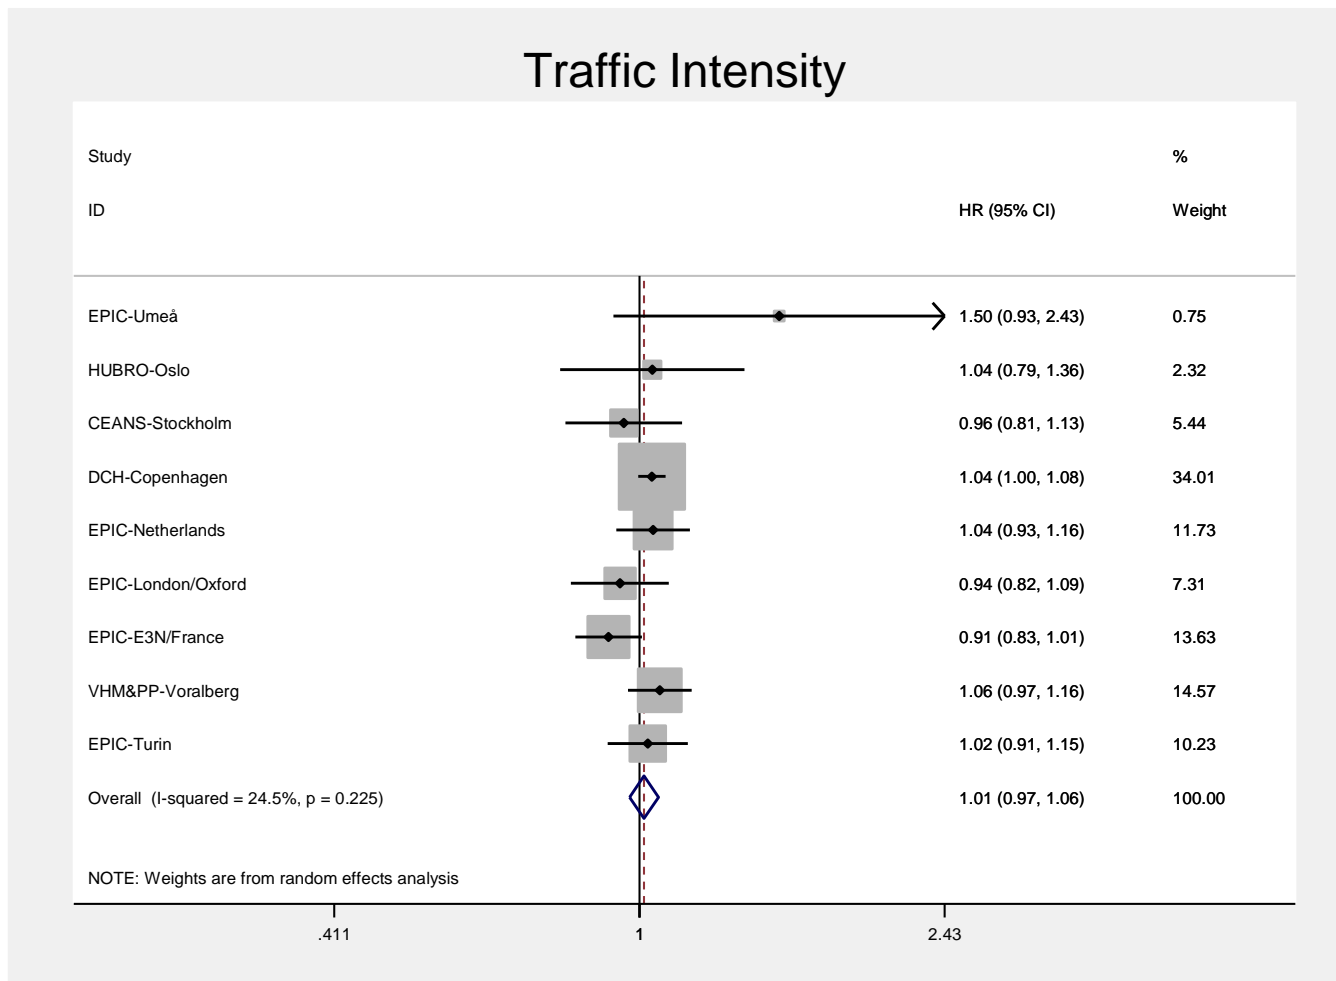

**Figure S1.** Adjusted associations between breast cancer and traffic intensity on the nearest road (per 5,000 mv/day), (main Model 3), results from cohort-specific analyses and random-effects analyses.

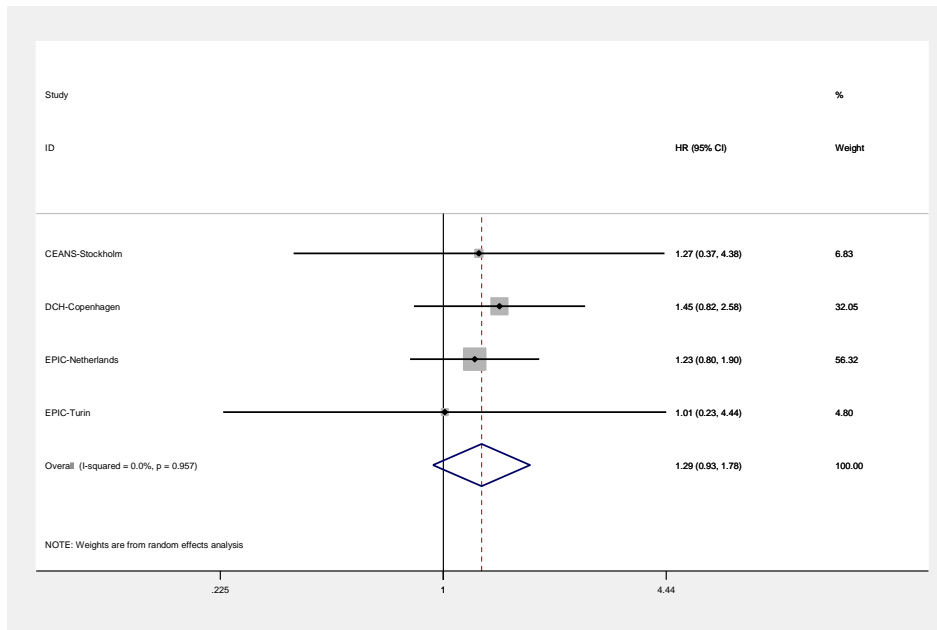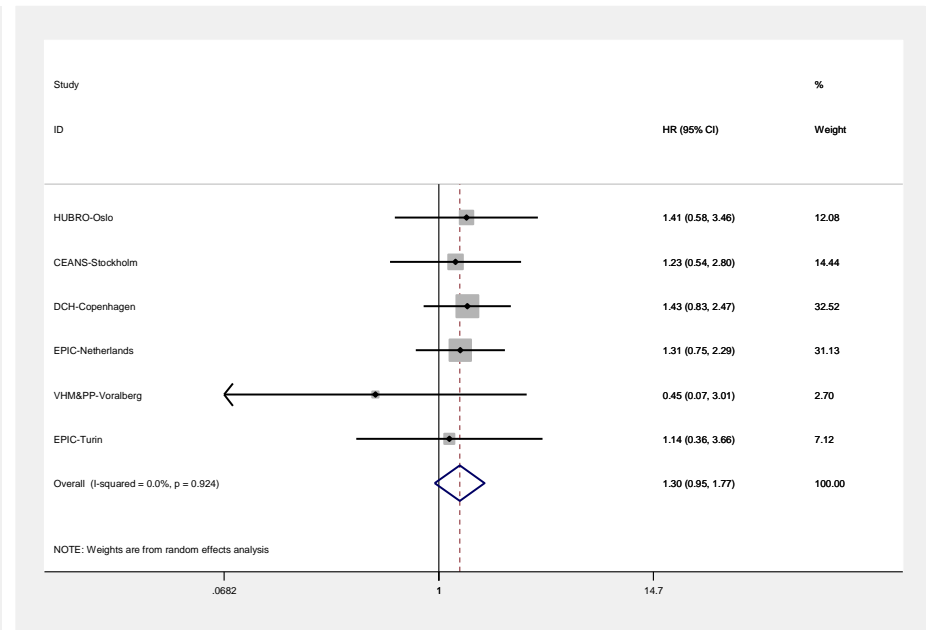

**Figure S2.** Adjusted associations between breast cancer and vanadium component of PM<sub>2.5</sub> (right) and PM<sub>10</sub> (left) (main Model 3) and, results from cohort-specific analyses and random-effects analyses.
